# Supplementary material for: “Turn-on” fluorescent sensor array for basic amino acids in water
Source: Royal Society of Chemistry journal article supplement (doi:10.1039/c3cc47416j), 2013-11-01
Supplement: c3cc47416j.pdf [file c3cc47416j.pdf]

## Supplementary Information

# “Turn-on” fluorescent sensor array for basic amino acids in water

Tsuyoshi Minami,<sup>a</sup> Nina A. Esipenko,<sup>a</sup> Ben Zhang,<sup>b</sup> Lyle Isaacs,<sup>\*b</sup> and Pavel Anzenbacher, Jr.<sup>\*a</sup>

---

<sup>a</sup> Department of Chemistry and Center for Photochemical Sciences, Bowling Green State University, Bowling Green, OH 43403, USA E-mail: pavel@bgsu.edu

<sup>b</sup> Department of Chemistry and Biochemistry, University of Maryland, College Park, MD, USA 20742. E-mail: lisaacs@umd.edu

## Contents

|                                            |    |
|--------------------------------------------|----|
| <b>General</b>                             | S2 |
| <b>Fluorescence property</b>               | S3 |
| <b>Examples of fluorescence titrations</b> | S4 |
| <b>Qualitative analysis</b>                | S8 |
| <b>References</b>                          | S9 |

## General

Starting materials were purchased from commercial suppliers and used without further purification. Compounds **1** and **2** were prepared according to the literature procedures.<sup>1,2</sup> Mass spectrometry was performed using Shimadzu LCMS-8030 liquid chromatograph mass spectrometer (ESI).

Fluorescence measurements were performed on a single photon counting spectrofluorimeter from Edinburgh Analytical Instruments (FL/FS 920). Diluted solutions used for all photophysical experiments were prepared using nanopure water in quartz cuvettes. Solutions of **1** were excited at 266 nm or 280 nm. Solutions of **2** were excited at 301 nm. Fluorescence emission spectra were recorded between 300 nm and 400 nm for **1**, between 320 nm and 550 nm for **2**, respectively. The slits of both excitation and emission monochrometers were set to 2.2 nm for **1**, 2.5 nm for **2**, respectively. The emission was scanned in 1 nm steps with a dwell time of 0.20 sec under ambient room conditions. Guest titrations were performed in water in the presence or the absence of Eu<sup>3+</sup> ion (0.3 mM). Titration isotherms were constructed from changes in the fluorescence maximum at 319 nm for **1**, 369 nm for **2**, respectively. Data analysis was performed according to previously published methods.<sup>3</sup>

The array experiments were performed in 1536-well plates using a Beckman BioRAPTR microfluidic robotic dispenser. The fluids (water, probe, Eu<sup>3+</sup> ion and analyte solutions) were contact-free dispensed at 200 nL/s as follows. Each experiment was performed in 24 repetitions. Each well received 1 μL of water at pH 3, 5, and 7 followed by 1 μL of **1** or **2** (12 μM), and 1 μL of Eu<sup>3+</sup> ion solution (0, 0.1, 0.3, and 1 mM), after which the mixture was equilibrated for 2 min to establish a probe-metal ion

complex. Subsequently, 1  $\mu\text{L}$  of analyte solutions ([lisinopril], [histidine], [ornithine], [histidinol], [arginine], [lysine], [histamine] = 50  $\mu\text{M}$ , [putrescine], [agmatine], [cadaverine] = 12  $\mu\text{M}$ ) were added. For control experiments, 1  $\mu\text{L}$  of water was added instead of analyte solution. After the analyte was dispensed, the plate was centrifuged (2 min, 3000 rpm, 21  $^{\circ}\text{C}$ ) and immediately measured by a BMG PheraStar microplate reader using 280 nm excitation, 320 nm emission for **1** and 300 nm excitation, 370 nm emission for **2**. The resulting emission data were subjected to the Student's t-test to exclude 4 outlier data-points (of 24 repetitions). The coefficient of variability among the data within the class of 20 repetitions was lower than 5%. Thus obtained data were then analyzed using LDA or HCA without any further pretreatment.

### Fluorescence property

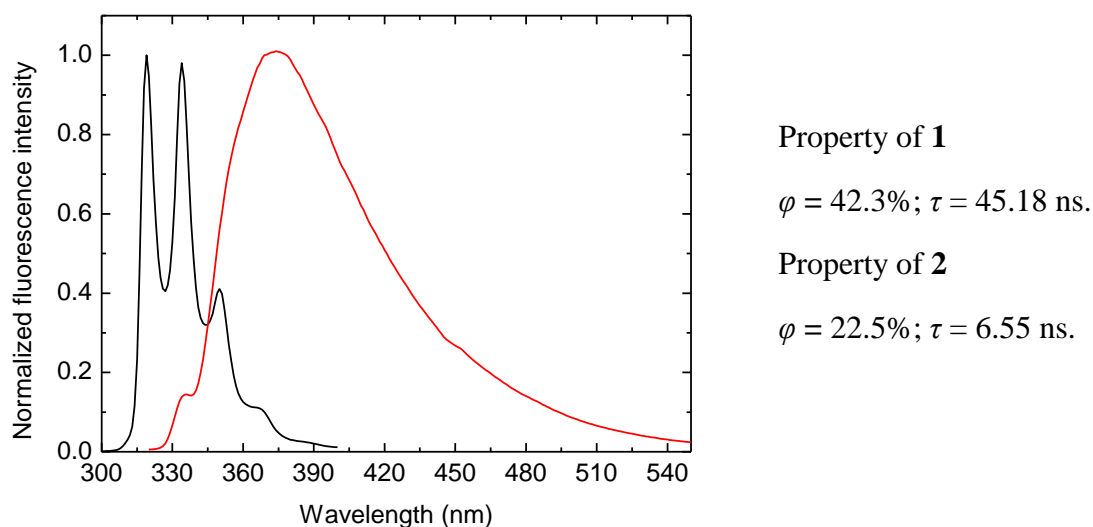

**Fig. S1.** Fluorescence spectra of **1** (black line) and **2** (red line) in water.  $\lambda_{\text{ex}} = 266$  nm for **1**,  $\lambda_{\text{ex}} = 301$  nm for **2**. Fluorescence quantum yields were determined by using tryptophan in water as a standard.

### Examples of fluorescence titrations

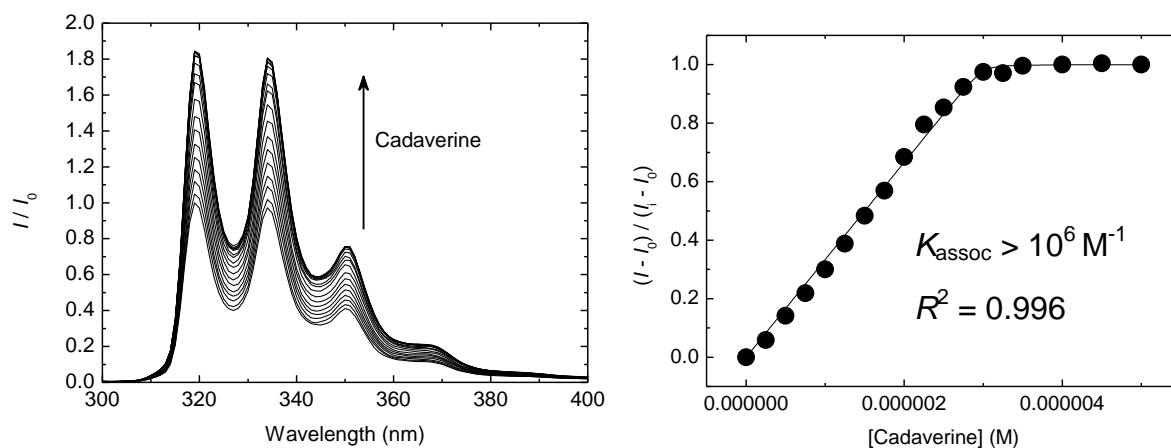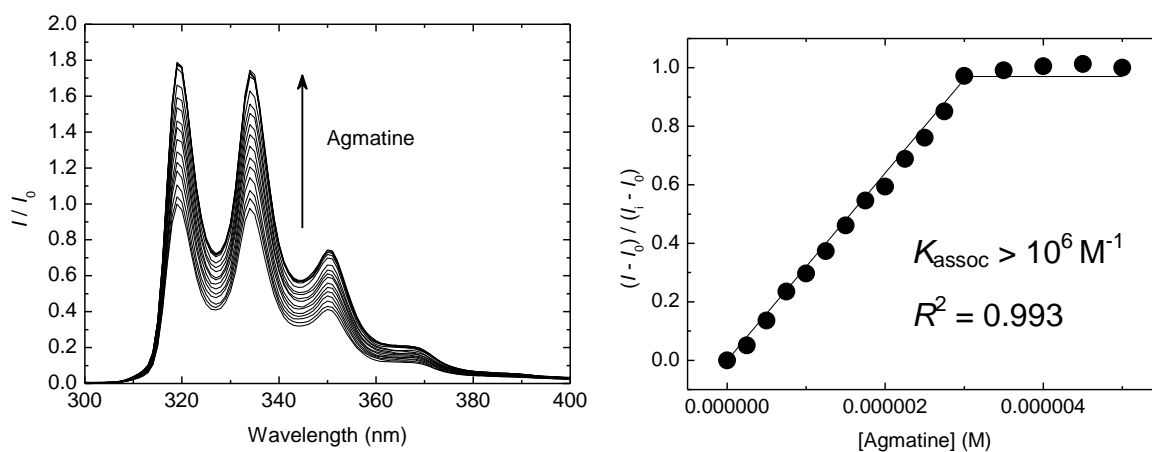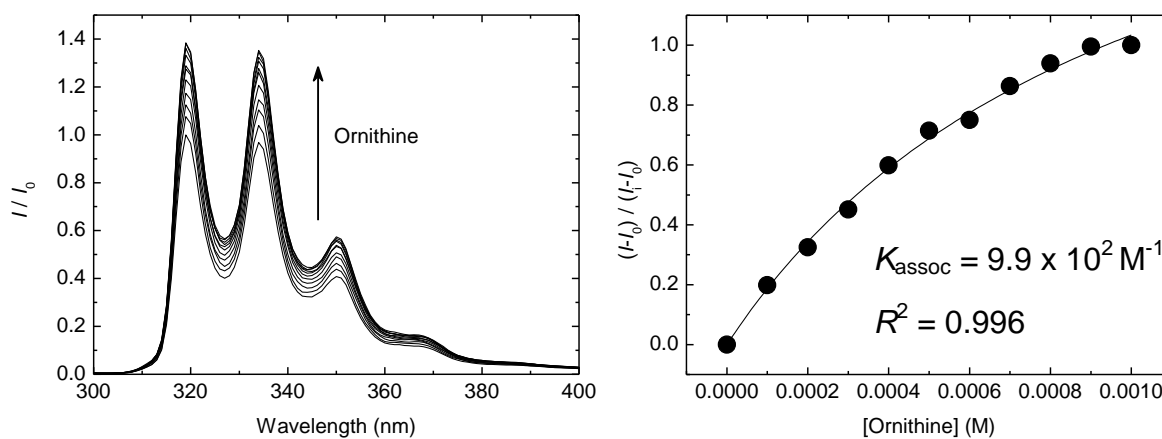

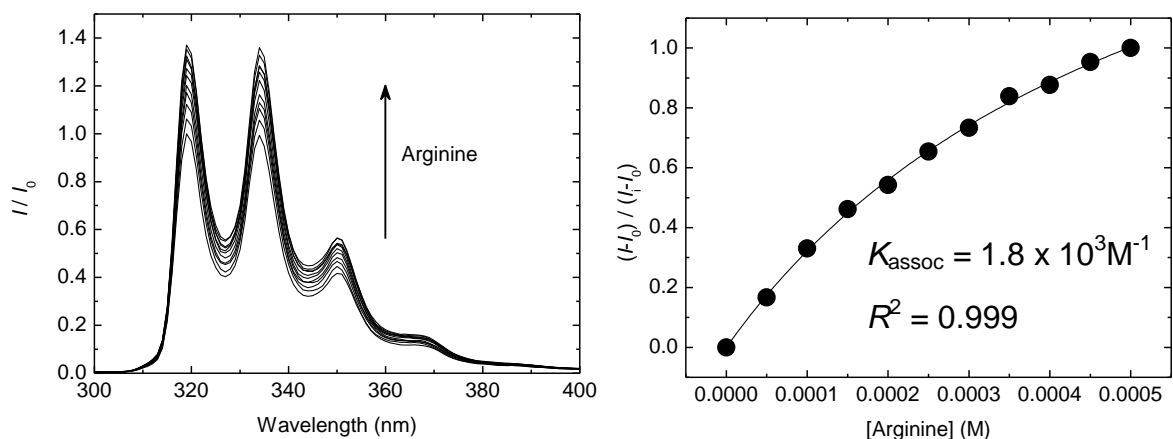

**Fig. S5.** Fluorescence spectra of **1** (3 μM) upon addition of incremental amounts of arginine in water with Eu(NO<sub>3</sub>)<sub>3</sub> (300 μM) at pH 7. λ<sub>ex</sub> = 266 nm. [Arginine] = 0 – 500 μM.

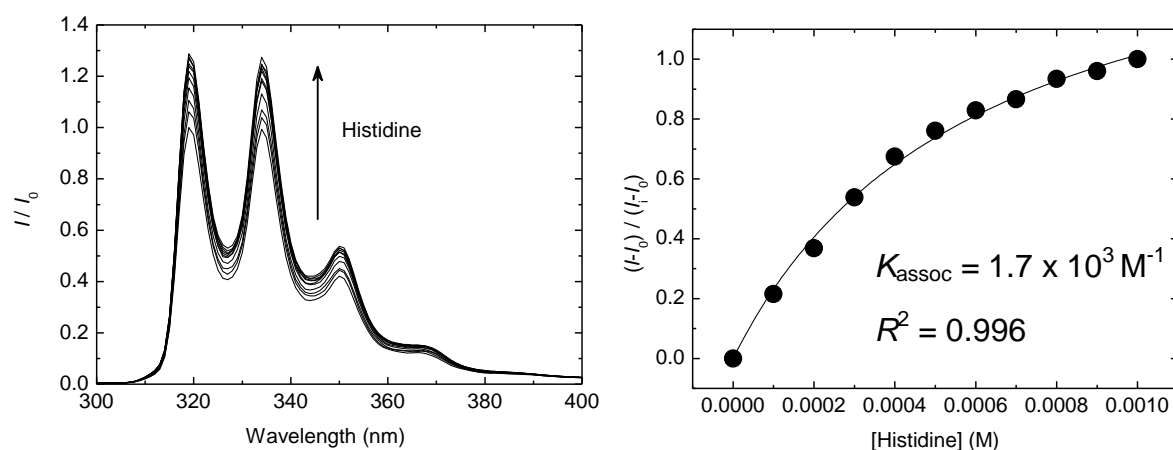

**Fig. S6.** Fluorescence spectra of **1** (3 μM) upon addition of incremental amounts of histidine in water with Eu(NO<sub>3</sub>)<sub>3</sub> (300 μM) at pH 7. λ<sub>ex</sub> = 266 nm. [Histidine] = 0 – 1 mM.

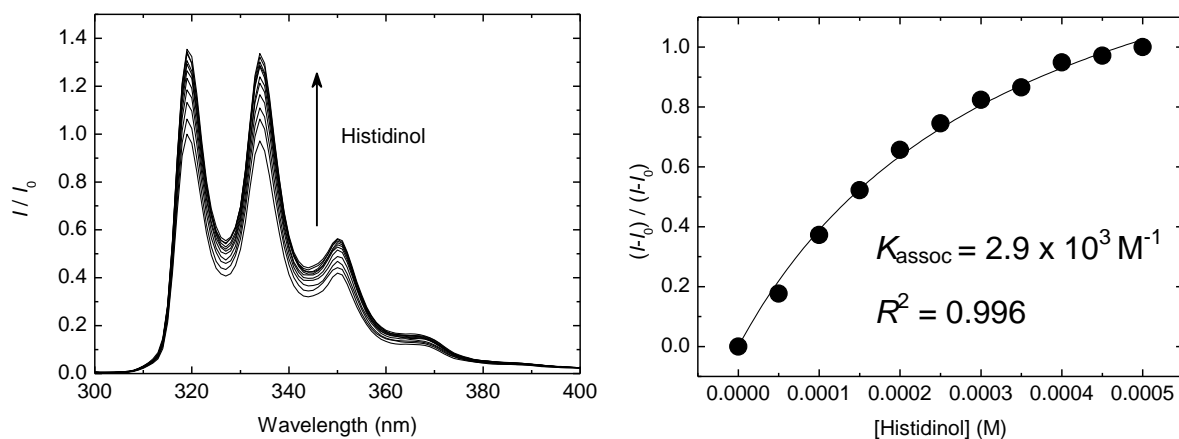

**Fig. S7.** Fluorescence spectra of **1** (3 μM) upon addition of incremental amounts of histidinol in water with Eu(NO<sub>3</sub>)<sub>3</sub> (300 μM) at pH 7. λ<sub>ex</sub> = 266 nm. [Histidinol] = 0 – 500 μM.

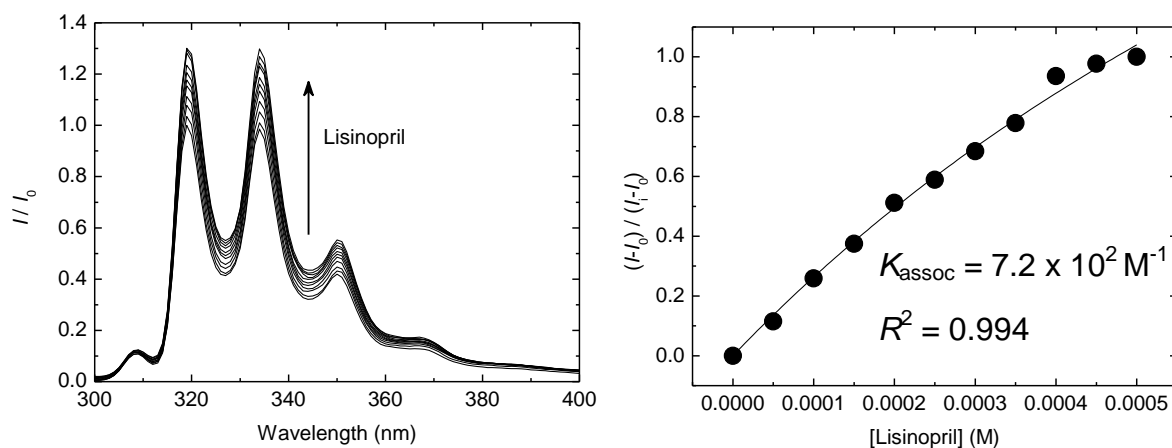

**Fig. S8.** Fluorescence spectra of **1** (3 μM) upon addition of incremental amounts of lisinopril in water with Eu(NO<sub>3</sub>)<sub>3</sub> (300 μM) at pH 3. λ<sub>ex</sub> = 280 nm. [Lisinopril] = 0 – 500 μM.

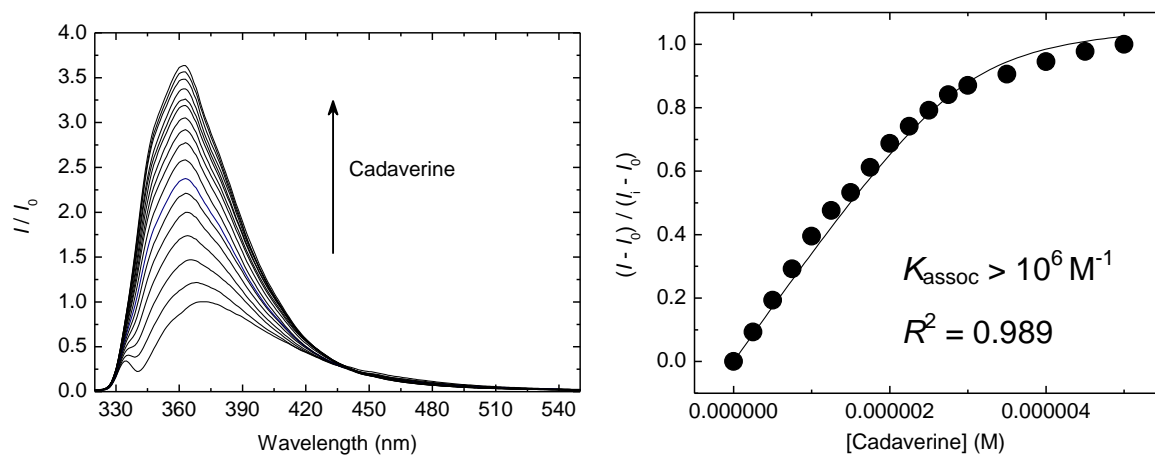

**Fig. S9.** Fluorescence spectra of **2** (3 μM) upon addition of incremental amounts of cadaverine in water with Eu(NO<sub>3</sub>)<sub>3</sub> (300 μM) at pH 7. λ<sub>ex</sub> = 301 nm. [Cadaverine] = 0 – 5 μM.

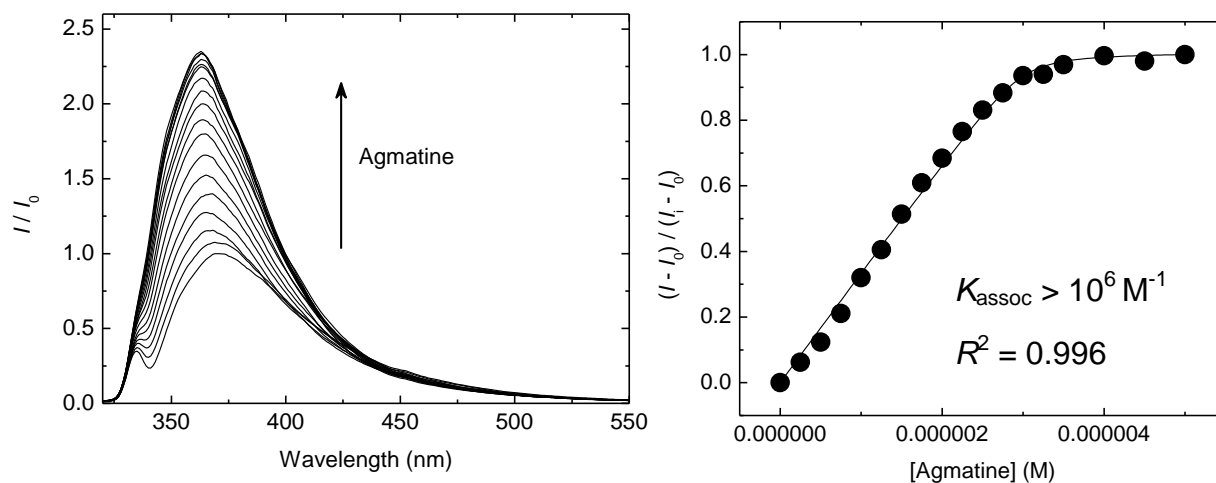

**Fig. S10.** Fluorescence spectra of **2** (3 μM) upon the addition of incremental amounts of agmatine in water with Eu(NO<sub>3</sub>)<sub>3</sub> (300 μM) at pH 7. λ<sub>ex</sub> = 301 nm. [Agmatine] = 0 – 5 μM.

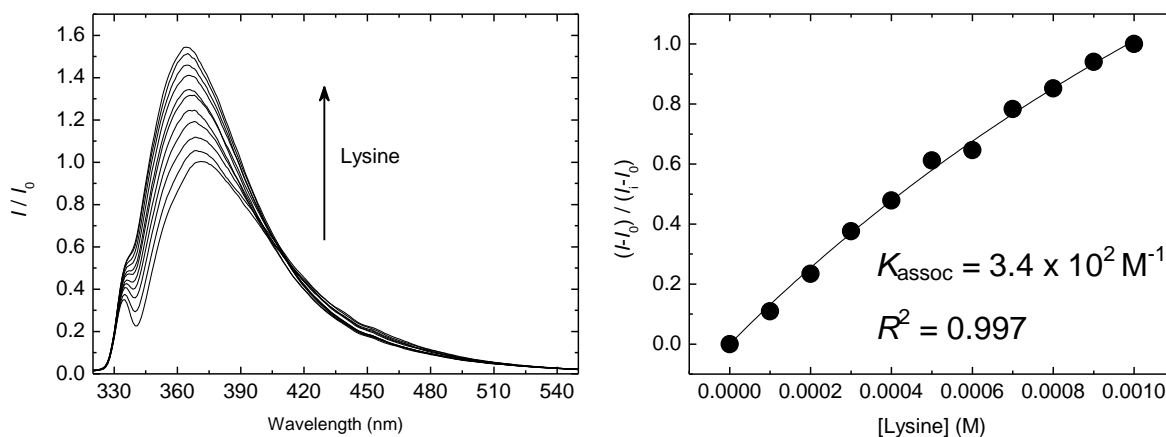

**Fig. S11.** Fluorescence spectra of **2** (3 μM) upon addition of incremental amounts of lysine in water with  $\text{Eu}(\text{NO}_3)_3$  (300 μM) at pH 7.  $\lambda_{\text{ex}} = 301 \text{ nm}$ . [Lysine] = 0 – 1 mM.

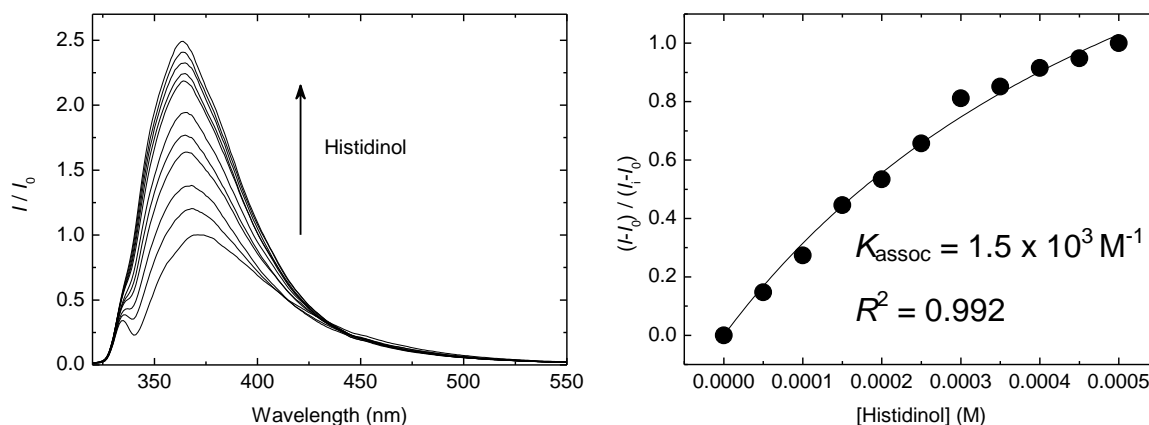

**Fig. S12.** Fluorescence spectra of **2** (3 μM) upon addition of incremental amounts of histidinol in water with  $\text{Eu}(\text{NO}_3)_3$  (300 μM) at pH 7.  $\lambda_{\text{ex}} = 301 \text{ nm}$ . [Histidinol] = 0 – 500 μM.

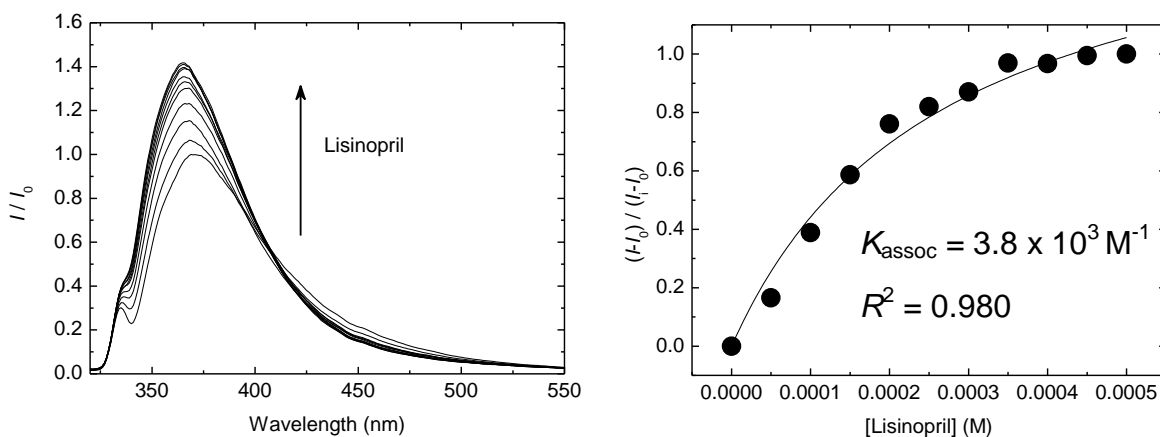

**Fig. S13.** Fluorescence spectra of **2** (3 μM) upon addition of incremental amounts of lisinopril in water with  $\text{Eu}(\text{NO}_3)_3$  at pH 3.  $\lambda_{\text{ex}} = 301 \text{ nm}$ . [Lisinopril] = 0 – 500 μM.

## Qualitative analysis

**Table 1.** The Jackknifed classification matrix.

Jackknifed Classification Matrix

|                | A1 Putrescine | A10 Lisinopril | A2 Agmatine | A3 Cadaverine | A4 Lysine | A5 Arginine | A6 Histidinol | A7 L-Ornithine |
|----------------|---------------|----------------|-------------|---------------|-----------|-------------|---------------|----------------|
| A1 Putrescine  | 20            | 0              | 0           | 0             | 0         | 0           | 0             | 0              |
| A10 Lisinopril | 0             | 20             | 0           | 0             | 0         | 0           | 0             | 0              |
| A2 Agmatine    | 0             | 0              | 20          | 0             | 0         | 0           | 0             | 0              |
| A3 Cadaverine  | 0             | 0              | 0           | 20            | 0         | 0           | 0             | 0              |
| A4 Lysine      | 0             | 0              | 0           | 0             | 20        | 0           | 0             | 0              |
| A5 Arginine    | 0             | 0              | 0           | 0             | 0         | 20          | 0             | 0              |
| A6 Histidinol  | 0             | 0              | 0           | 0             | 0         | 0           | 20            | 0              |
| A7 Ornithine   | 0             | 0              | 0           | 0             | 0         | 0           | 0             | 20             |
| A8 Histidine   | 0             | 0              | 0           | 0             | 0         | 0           | 0             | 0              |
| A9 Histamine   | 0             | 0              | 0           | 0             | 0         | 0           | 0             | 0              |
| Ctrl           | 0             | 0              | 0           | 0             | 0         | 0           | 0             | 0              |
| Total          | 20            | 20             | 20          | 20            | 20        | 20          | 20            | 20             |

Jackknifed Classification Matrix (contd...)

|                | A8 Histidine | A9 Histamine | Ctrl | %correct |
|----------------|--------------|--------------|------|----------|
| A1 Putrescine  | 0            | 0            | 0    | 100      |
| A10 Lisinopril | 0            | 0            | 0    | 100      |
| A2 Agmatine    | 0            | 0            | 0    | 100      |
| A3 Cadaverine  | 0            | 0            | 0    | 100      |
| A4 Lysine      | 0            | 0            | 0    | 100      |
| A5 Arginine    | 0            | 0            | 0    | 100      |
| A6 Histidinol  | 0            | 0            | 0    | 100      |
| A7 Ornithine   | 0            | 0            | 0    | 100      |
| A8 Histidine   | 20           | 0            | 0    | 100      |
| A9 Histamine   | 0            | 20           | 0    | 100      |
| Ctrl           | 0            | 0            | 20   | 100      |
| Total          | 20           | 20           | 20   | 100      |

## Canonical Scores Plot

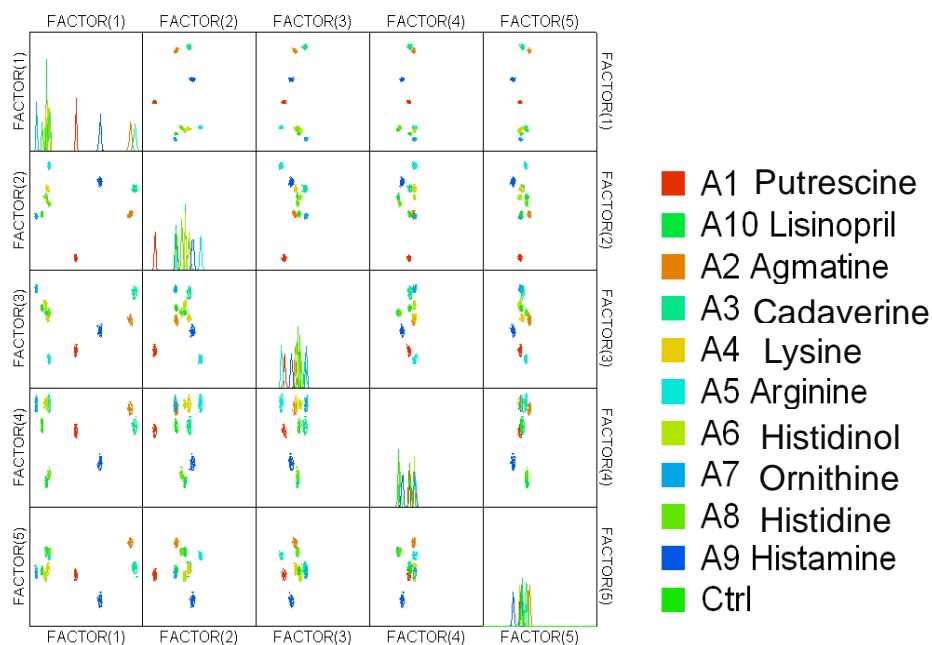

**Fig. S14.** The canonical scores plot.



## References

1. D. Lucas, T. Minami, G. Iannuzzi, L. Cao, J. B. Wittenberg, P. Anzenbacher Jr., L. Isaacs, *J. Am. Chem. Soc.*, 2011, **133**, 17966.
2. T. Minami, N. A. Esipenko, B. Zhang, M. E. Kozelkova, L. Isaacs, R. Nishiyabu, Y. Kubo, P. Anzenbacher Jr., *J. Am. Chem. Soc.*, 2012, **134**, 20021.
3. J. R. Lakowicz, *Principles of Fluorescence Spectroscopy 3rd Ed.*, Springer, New York, 2006.
